# Supplementary material for: Infection with flaviviruses requires BCLXL for cell survival
Source: PubMed Central journal article supplement (PMC6177207; doi:10.1371/journal.ppat.1007299), 2018-09-27
Supplement: ppat.1007299.s007.pdf [file ppat.1007299.s007.pdf]

1 **Supporting Information**

2 **S1 Table. DNA oligos for generating gene-knockout cell lines.**

|               |                                                                                                                                                      |
|---------------|------------------------------------------------------------------------------------------------------------------------------------------------------|
|               | Target sequence for Cas9<br>Forward primer for cloning into pCAG EGxxFP and sequencing<br>Reverse primer for cloning into pCAG EGxxFP and sequencing |
| Human<br>BCLX | 5'- GAGACCCCCAGTGCCATCAATGG -3'<br>5'- CAACCACTGAGGATCCCGGACTCAGACCTTCATAAGAGC -3'<br>5'- TGCCGATATCGAATTCGAAGGGTAGCCAGGATGAAAGA -3'                 |
| Human<br>MCL1 | 5'- GGACTCAACCTCTACTGTGGGGG -3'<br>5'- CAACCACTGAGGATCCTCACAAATCAGGTCTCAGGGAAG -3'<br>5'- TGCCGATATCGAATTCCTGACTCGTTTCGGTTTCCAAC -3'                 |
| Human<br>BIM  | 5'-CCTCATCCCTCCAAGAAAGGAGC-3'<br>5'-CAACCACTGAGGATCCTTGCCCTTATCTGTTGGGCTTTG-3'<br>5'-TGCCGATATCGAATTCAGTCCTTTACCACAGTTTACCAG-3'                      |
| Human<br>NOXA | 5'-GGACTGGTTCAGGAGCATCCCGG-3'<br>5'-CAACCACTGAGGATCCTGATCGCTGCCTAGCTTGTC-3'<br>5'-TGCCGATATCGAATTCCTACTACAGATCCCACCAGCC-3'                           |
| Human<br>BID  | 5'-GAAAGGGCCCTCACTGTGGATGG-3'<br>5'-CAACCACTGAGGATCCGCCTTTCTATTAGCTGCAACTTC-3'<br>5'-TGCCGATATCGAATTCCTGCCAAGACAAGCACTGTG-3'                         |
| Human<br>BAX  | 5'-CCAGACATACTACGAGTCTTTTG-3'<br>5'-CAACCACTGAGGATCCGTCTTGGCAGTGAAACTGAAG-3'<br>5'-TGCCGATATCGAATTCGAACAAAGCCAAGACGCCTG-3'                           |
| Human<br>BAK  | 5'-CCAGACATACTACGAGTCTTTTG-3'<br>5'-CAACCACTGAGGATCCGTCTTGGCAGTGAAACTGAAG-3'<br>5'-TGCCGATATCGAATTCGAACAAAGCCAAGACGCCTG-3'                           |
| Human<br>MULE | 5'-GCTAACTCGGCTACAACATTTGG-3'<br>5'-CAACCACTGAGGATCCGGTTCACACCATTCTCCTGC-3'<br>5'-TGCCGATATCGAATTCAGGGCACCAATAGTTCTAACTC-3'                          |
| Mouse<br>Bclx | 5'-TGGAACCCATCCTGGCACCTGG-3'<br>5'-CAACCACTGAGGATCCTCGACTTTCTCTCCTACAAGC-3'<br>5'-TGCCGATATCGAATTCGAAGGCTCTAGGTGGTCATTCAG-3'                         |

3  
4  
5
